# Supplementary material for: The relationships between toad behaviour, antipredator defences, and spatial and sexual variation in predation pressure
Source: PeerJ. 2022 Feb 17;10:e12985. doi: 10.7717/peerj.12985 (PMC8858576; doi:10.7717/peerj.12985)
Supplement: Supplemental Information 2 [file peerj-10-12985-s002.xls]

## Sheet: calamita_dataset
Habitat	Sex	Body_Mass	Parotoid_Gland_Contrast	First_Move	PC1	PCa	PCb		Squares_Visited	Square_Visits	Internal_Squares_Visited	External_Squares_Visited	Internal_Square_Visits	External_Square_Visits	External_Square_Visit_Ratio	External_Squares_Visited_Ratio	Activity_Time_(s)	Relative_Sprint_Speed_(cm/s)	Relative_Parotoid_Gland_Area_(mm2)
Pine_Grove	Female	29.18	9.23309	1	-1.40055	2.38058	-1.32664		17	45	1	16	1	44	0.977778	0.941176	151	-19.9441	-11.7322
Pine_Grove	Male	28.91	13.5093	1	0.426293	-0.062836	0.764582		11	11	2	9	2	9	0.818182	0.818182	14	18.1559	-4.7822
Pine_Grove	Female	14.33	5.5	6	-1.111	0.218661	0.444718		12	12	1	11	1	11	0.916667	0.916667	46	-12.2261	-11.7914
Pine_Grove	Female	31.93	6.04152	13	-0.659338	1.50316	-0.5694		10	11	3	7	3	8	0.727273	0.7	259	-7.56072	-6.78693
Pine_Grove	Female	13.13	14.3788	218	-0.570041	-0.780724	1.51027		4	4	2	2	2	2	0.5	0.5	7	2.84968	-12.3555
Pine_Grove	Female	33.42	9.43398	25	-2.42175	-0.368261	1.01527		8	8	2	6	2	6	0.75	0.75	16	-19.7131	-30.4976
Pine_Grove	Female	46.06	15.6045	8	-2.34241	-0.512798	1.00998		7	7	1	6	1	6	0.857143	0.857143	19	-37.6578	-16.649
Pine_Grove	Male	21.42	9.17878	131	-0.0737502	-0.443524	1.26729		6	6	3	3	3	3	0.5	0.5	23	1.62493	-2.4668
Pine_Grove	Male	10.27	12.51	60	0.740615	-0.963391	1.15405		3	3	0	3	0	3	1	1	31	8.97345	7.2913
Pine_Grove	Female	11.76	13.9014	16	-0.470479	-1.12026	1.29547		3	3	0	3	0	3	1	1	7	-0.581308	-8.17005
Pine_Grove	Male	19.87	11.6726	28	-0.324067	-0.75458	1.4867		4	4	2	2	2	2	0.5	0.5	11	-5.37458	-2.1895
Pine_Grove	Female	33.04	4.41588	3	-1.01106	-0.925691	1.44699		3	3	1	2	1	2	0.666667	0.666667	14	3.71453	-20.9883
Pine_Grove	Male	29.74	11.3688	12	-1.42305	-0.618129	1.08393		5	7	1	4	1	6	0.857143	0.8	26	-17.2636	-13.9949
Pine_Grove	Female	12.63	13.8293	20	-0.173727	0.901449	0.0939581		18	18	3	15	3	15	0.833333	0.833333	38	-7.15368	1.77927
Pine_Grove	Female	10.08	7.5	8	-0.509111	2.97807	-1.64326		20	60	4	16	4	56	0.933333	0.8	122	-12.8413	-0.400052
Pine_Grove	Female	33.14	5.31507	1	-0.0105307	-0.806868	1.53384		4	4	2	2	2	2	0.5	0.5	3	-9.66121	6.48577
Pine_Grove	Male	31.87	12.9422	41	-0.463913	-2.20584	-0.416097		4	4	0	14	0	17	4.25	3.5	12	2.28592	-10.0322
Pine_Grove	Female	10.61	12.855	25	-0.564737	-0.375653	1.36957		6	6	0	2	0	2	0.333333	0.333333	22	3.19869	-12.5001
Pine_Grove	Male	18.44	11.0114	3	0.826983	-1.92358	-0.479282		6	6	2	16	2	32	5.33333	2.66667	9	8.40968	9.25455
Pine_Grove	Female	10.62	6.59545	27	-0.560969	3.19639	-1.24612		17	50	0	3	0	3	0.06	0.176471	195	-3.79131	-7.60005
Pine_Grove	Female	12.84	13.0096	163	-0.891107	-0.626304	1.49964		5	5	1	2	1	2	0.4	0.4	6	-21.9808	-1.04275
Pine_Grove	Male	19.4	12.6293	78	-1.2323	-3.95655	-2.42879		3	3	1	16	1	33	11	5.33333	6	-20.5951	-8.2168
Pine_Grove	Female	16.93	5.22015	110	-1.87643	-0.715364	1.45135		4	4	2	2	2	2	0.5	0.5	17	-20.9256	-19.7241
Pine_Grove	Male	10.75	14.2916	16	-0.307177	-2.93567	-1.3239		4	4	1	16	1	31	7.75	4	7	-3.17893	-3.39938
Pine_Grove	Male	14.11	8.01561	2	-0.777088	1.63275	-0.226511		10	17	2	3	2	3	0.176471	0.3	218	-16.9208	-2.46275
Pine_Grove	Male	17.5	11.1803	16	-0.339162	2.92956	-0.955279		18	40	1	2	1	2	0.05	0.111111	188	-16.5156	5.2359
Pine_Grove	Male	11.42	6.44205	16	-0.600458	-1.01702	1.23291		4	4	0	4	0	4	1	1	5	-10.3889	-3.75938
Pine_Grove	Female	16.07	5.89491	37	-0.01161	-0.0140255	1.03341		7	10	1	3	1	3	0.3	0.428571	48	-3.64319	2.30657
Pine_Grove	Male	17.01	12.8452	9	-1.76674	0.270623	0.530258		12	15	2	8	2	15	1	0.666667	30	-33.9903	-8.69545
Pine_Grove	Female	16.56	12.7377	10	-0.33827	-1.44444	-0.677801		7	7	2	16	2	38	5.42857	2.28571	50	-8.37844	-0.372078
Pine_Grove	Female	13.01	8.3666	14	-0.227025	2.14015	-0.451936		14	17	2	2	2	2	0.117647	0.142857	236	-15.0837	6.28927
Pine_Grove	Male	21.09	8.21584	2	-1.70506	2.92015	-1.05041		20	45	1	6	1	9	0.2	0.3	148	-33.8374	-7.67748
Pine_Grove	Female	34.98	6.7082	14	-2.18227	-1.91677	0.0588703		4	4	1	11	1	14	3.5	2.75	5	-10.886	-32.2356
Pine_Grove	Female	9.67	11.3358	23	-0.279284	3.30572	-1.36842		19	46	2	5	2	5	0.108696	0.263158	211	-13.8589	4.49062
Agrosystem	Female	15.16	7.48331	13	-1.14654	1.40689	-0.270842		17	29	0	14	0	17	0.586207	0.823529	67	-17.1561	-9.0314
Agrosystem	Male	45.96	12.9035	2	1.01664	-4.29322	-3.20065		3	3	4	16	4	42	14	5.33333	27	-6.28735	22.8683
Agrosystem	Female	22.15	9.20598	10	-0.307431	2.79106	-0.886045		17	48	1	3	1	3	0.0625	0.176471	143	-6.70507	-0.966803
Agrosystem	Male	19.8	8.04674	6	-0.557731	0.605707	-0.337402		16	18	3	16	3	42	2.33333	1	62	-3.64319	-7.64343
Agrosystem	Female	45.49	12.6886	2	-2.25076	-3.66712	-2.09229		3	3	1	16	1	28	9.33333	5.33333	10	-23.0755	-25.0583
Agrosystem	Female	37.32	8.97218	8	-1.85818	1.78244	-0.0656289		17	21	0	3	0	3	0.142857	0.176471	125	-38.2565	-7.41288
Pine_Grove	Male	33.35	7.64853	10	0.0415321	0.498872	-0.543419		14	17	1	16	1	47	2.76471	1.14286	93	8.00117	-4.77355
Pine_Grove	Male	13.61	12.0208	24	-0.0763493	-4.53269	-2.88247		2	2	0	16	0	18	9	8	5	10.2468	-8.47343
Pine_Grove	Male	17.57	14.2302	2	-0.250948	2.30803	-0.414313		18	33	1	2	1	2	0.0606061	0.111111	128	15.9621	-15.6048
Pine_Grove	Male	31.66	5.83095	1	-0.13763	-3.27199	-1.49262		3	3	1	16	1	20	6.66667	5.33333	6	23.9322	-19.049
Pine_Grove	Male	29.77	10.3441	41	0.375962	-0.905406	1.37748		4	4	1	3	1	3	0.75	0.75	5	-5.65408	10.7578
Pine_Grove	Male	25.73	11.4127	38	2.16119	0.165465	0.978154		10	13	2	4	2	4	0.307692	0.4	21	48.563	5.80982
Pine_Grove	Male	24.51	6.18466	4	0.0469637	1.30061	0.347817		17	17	3	3	3	3	0.176471	0.176471	72	3.51067	-1.57085
Pine_Grove	Male	26.1	19.7864	52	0.943972	-0.23077	-0.185523		11	17	1	16	1	48	2.82353	1.45455	35	19.993	3.37982
Pine_Grove	Male	24.92	7.38241	3	0.260669	1.39001	0.237577		16	30	0	4	0	4	0.133333	0.25	36	13.8693	-4.83693
Pine_Grove	Male	27.72	3.937	12	0.502135	1.48561	-0.295308		16	16	1	9	1	12	0.75	0.5625	149	19.993	-4.67018
Agrosystem	Male	15.98	8.27647	18	-0.0122583	-3.05482	-1.21046		3	3	2	16	2	16	5.33333	5.33333	7	-5.48032	3.56455
Agrosystem	Male	21.46	9.72111	47	0.673691	2.62753	-1.21946		17	34	0	11	0	17	0.5	0.647059	219	12.2878	3.78117
Agrosystem	Male	26.03	8.29156	37	0.356447	-2.90924	-1.2581		4	4	0	16	0	30	7.5	4	5	12.2878	-1.99883
Agrosystem	Male	24	10.8051	77	2.22552	1.98125	-0.680866		17	32	3	13	3	13	0.40625	0.764706	133	32.5054	18.0805
Agrosystem	Male	47.37	16.5605	8	1.05105	-0.641053	0.961665		6	9	0	6	0	9	1	1	12	10.8074	11.6797
Agrosystem	Female	26.12	17.5285	9	-1.33339	1.46146	-0.580912		15	29	1	14	1	28	0.965517	0.933333	115	11.063	-31.9402
Agrosystem	Female	14.45	13.0192	67	0.0994323	2.33536	-1.23144		18	37	2	16	2	35	0.945946	0.888889	168	-5.01606	5.2786
Agrosystem	Female	43.45	17.4786	37	-1.85082	-0.892334	1.3657		4	4	1	3	1	3	0.75	0.75	7	-20.9378	-19.249
Agrosystem	Male	20.46	16.2558	13	-1.06127	-0.380495	0.750592		7	7	0	7	0	7	1	1	49	-21.2074	-4.67748
Agrosystem	Male	21.93	11.758	112	1.25363	-0.0786466	0.600512		11	11	0	11	0	11	1	1	24	11.6754	14.7705
Agrosystem	Male	34.62	18.6682	13	1.9733	0.175247	0.508084		13	13	1	12	1	12	0.923077	0.923077	22	41.8269	7.0424
Agrosystem	Female	47.55	12.6194	34	-1.05415	-0.879262	1.35391		4	4	1	3	1	3	0.75	0.75	9	-18.3402	-6.52963
Agrosystem	Male	28.46	11.5542	28	-0.217453	0.788612	0.0604577		17	18	1	16	1	17	0.944444	0.941176	41	-9.66121	2.71577
Agrosystem	Male	19.37	9.55249	16	2.19037	0.295057	0.163817		14	14	2	16	2	18	1.28571	1.14286	41	35.5673	15.3239
Agrosystem	Female	39.97	14.6116	1	0.111335	1.32013	-0.192134		17	25	0	14	0	14	0.56	0.823529	73	-12.7231	10.8224
Agrosystem	Female	40.64	9.02774	88	0.129368	-1.37033	-0.027696		7	7	1	16	1	24	3.42857	2.28571	13	4.93928	-1.05693
Agrosystem	Female	19.37	8.95824	39	0.419131	1.20834	0.0923914		11	24	2	5	2	5	0.208333	0.454545	113	1.62493	6.5132
Agrosystem	Male	19.12	18.4459	42	0.219344	-2.18702	-0.348441		4	4	1	10	1	23	5.75	2.5	7	1.62493	2.8732
Agrosystem	Female	29.77	13.8293	28	-0.181464	-0.226991	1.2557		8	8	1	3	1	3	0.375	0.375	12	1.67354	-4.46288
Agrosystem	Male	27.75	11.1467	36	1.2459	3.36614	-1.27687		23	59	2	6	2	6	0.101695	0.26087	104	4.12305	19.8498
Agrosystem	Female	51.21	12.4599	3	1.62445	0.60901	-0.586031		11	26	7	16	10	49	1.88462	1.45455	96	-5.67497	33.519
Agrosystem	Female	33.4	9.48683	45	1.41885	1.1156	0.0129813		16	27	2	9	2	24	0.888889	0.5625	41	8.61354	19.8971
Agrosystem	Male	22.15	9.75961	3	1.32124	-1.72796	-0.309391		5	8	0	16	0	27	3.375	3.2	18	23.6673	7.71387
Agrosystem	Male	16.68	14.9164	13	-0.237363	-1.53664	0.658551		3	3	0	5	0	8	2.66667	1.66667	13	-2.31269	-2.72613
Pine_Grove	Male	24.34	7.6974	50	1.75141	2.8321	-0.830177		19	42	1	2	1	2	0.047619	0.105263	150	31.2807	10.2891
Pine_Grove	Female	23.02	13.0096	14	0.654245	0.857681	-0.31491		18	20	3	16	3	40	2	0.888889	52	-7.82408	17.3278
Agrosystem	Female	37.6	14.7648	59	0.0154968	-0.654789	0.470573		8	11	0	14	0	14	1.27273	1.75	14	-3.22547	2.51172
Agrosystem	Female	18.21	7.10634	11	0.684665	-0.857369	0.258048		7	10	0	11	0	26	2.6	1.57143	25	2.84968	10.5045
Agrosystem	Male	27.55	5.40833	8	3.47463	-1.03799	0.852174		5	5	1	5	1	11	2.2	1	13	48.563	29.7398
Agrosystem	Male	39.33	9.06918	34	1.32654	-0.785272	1.25065		5	5	1	4	1	4	0.8	0.8	9	6.77641	19.4851
Agrosystem	Female	13.47	11.2583	4	1.08268	-0.560894	0.899716		7	7	2	6	2	9	1.28571	0.857143	22	17.1868	7.84657
Agrosystem	Male	21.5	13.1244	13	2.03603	1.30532	0.102936		14	33	1	6	1	9	0.272727	0.428571	45	51.6249	1.4132
Agrosystem	Female	15.07	10.025	14	1.34074	0.71415	0.607804		14	14	0	5	0	5	0.357143	0.357143	48	19.0239	11.2786
Agrosystem	Female	23.06	11.068	1	-0.0318287	1.83632	-0.128372		16	26	2	3	2	3	0.115385	0.1875	121	-9.91507	6.2732
Agrosystem	Female	23.36	14.7902	16	0.601218	0.531934	0.702026		14	14	1	6	1	6	0.428571	0.428571	25	1.67354	9.79712
Agrosystem	Female	26.3	8.07775	10	1.53049	0.542685	-0.065558		11	26	2	12	2	32	1.23077	1.09091	54	19.3807	14.4891
Agrosystem	Male	33.04	5.52268	42	1.27674	-0.659577	0.496316		6	12	3	11	3	11	0.916667	1.83333	29	5.96018	19.1418
Agrosystem	Female	48.78	10.1242	2	-0.240878	-2.18575	-0.557544		5	5	0	16	0	26	5.2	3.2	7	-24.8431	12.7824
